# Supplementary material
Source: Springer Nature journal article supplement (https://www.springermedizin.de/resource/supplementary/12981_2006_68_MOESM7_ESM.pdf/9603756)

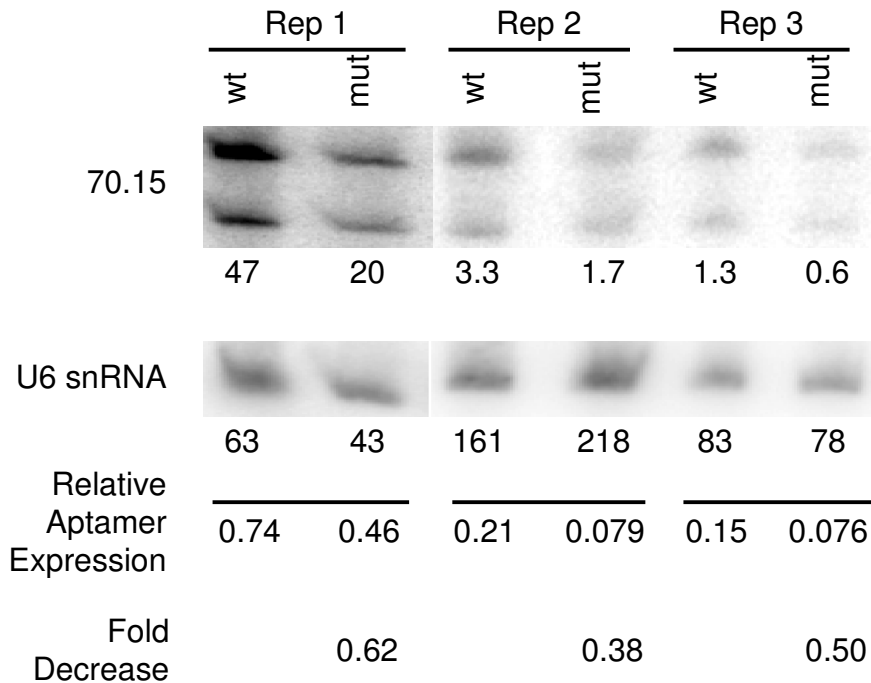

Supplement: MOESM7 [file 9603756]
